# Supplementary material for: Omega-3 polyunsaturated fatty acids inhibit IL-11/STAT3 signaling in hepatocytes during acetaminophen hepatotoxicity
Source: PubMed Central journal article supplement — Int J Mol Med. 2021 Aug 17;48(4):190. doi: 10.3892/ijmm.2021.5023 (PMC8416141; doi:10.3892/ijmm.2021.5023), 2021-08-17

Figure S1. N-3 PUFAs regulate Bcl-2 and Bax expression through regulation of STAT3 pathway. Primary hepatocytes were isolated from WT and *fat-1* mice (n=5) and were stimulated with 20 mM APAP *in vitro*. In some cases, cells were pretreated with 10  $\mu$ M C188-9 2 h before APAP treatment. The protein levels of Bcl-2, Bax and GAPDH expression were determined by western blotting 6 h post-APAP treatment. N-3 PUFAs, omega-3 polyunsaturated fatty acids; APAP, acetaminophen; WT, wild-type.

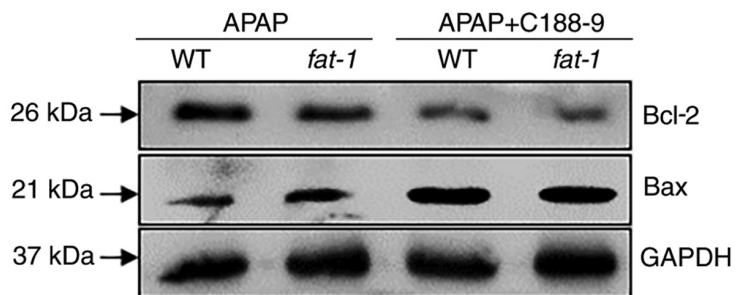

Supplement: Supplementary_Data.pdf [file Supplementary_Data.pdf]
